# Supplementary material for: Anti-Inflammatory Mesenchymal Stromal Cell-Derived Extracellular Vesicles Improve Pathology in Niemann–Pick Type C Disease
Source: MDPI journal article supplement (doi:10.3390/biomedicines9121864), 2021-12-08
Supplement: s1 [file s1]

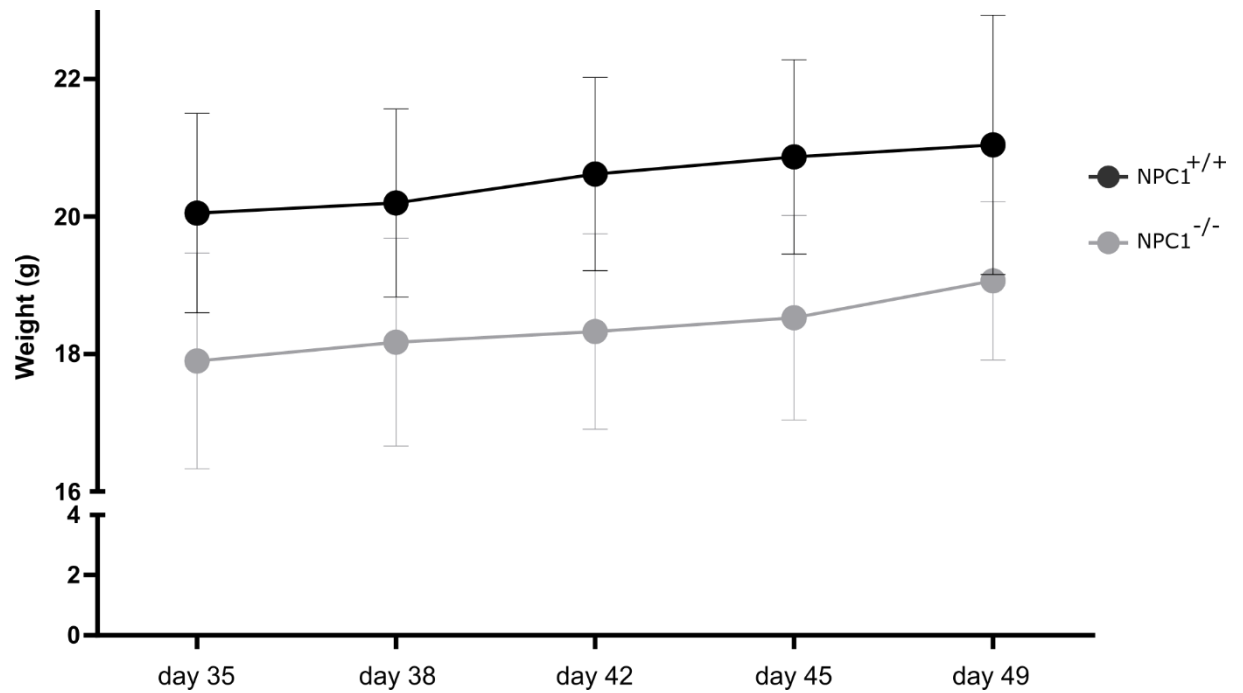

**Figure S1: NPC1<sup>-/-</sup> mice show a progressive lower weight compared to their wildtype littermates.** Changes in mean body weight of NPC1<sup>-/-</sup> and NPC1<sup>+/+</sup> mice from day 35 to 49 after birth. Data are shown as mean  $\pm$  SEM (n=10 mice per group).

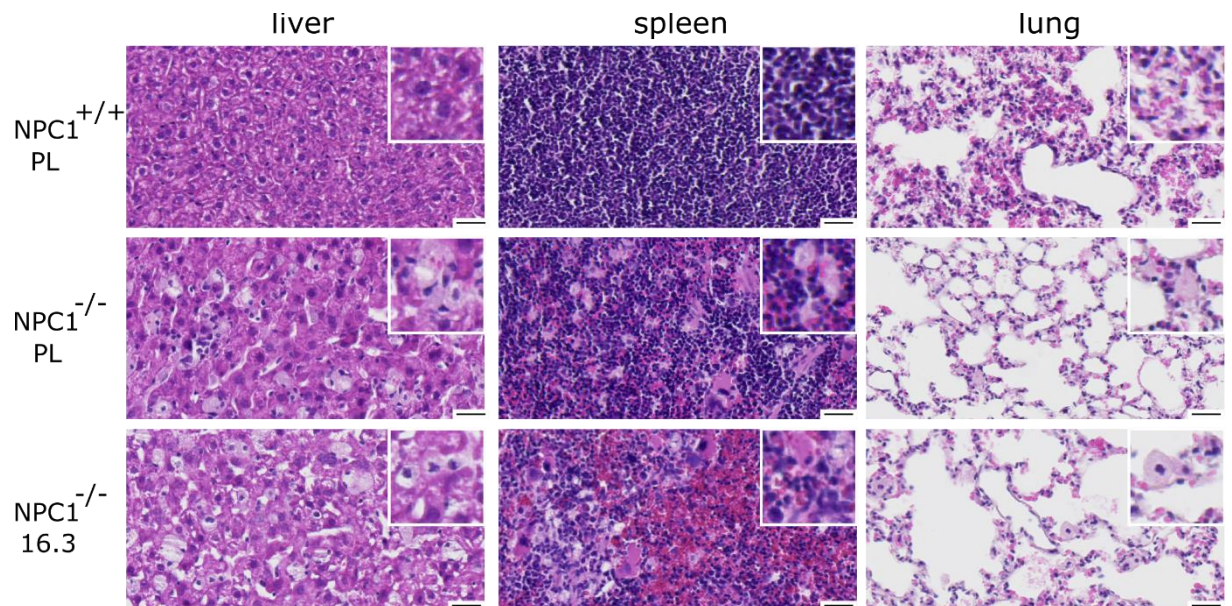

**Figure S2: MSC-EV type 16.3 has no effect on NPC1<sup>-/-</sup> pathology in peripheral organs.** NPC1<sup>-/-</sup> mice and wild type littermates are in the course of two weeks four times injected intravenous into the lateral tail vein with vehicle, platelet derived EVs (PL EVs) or MSC-EVs derived from human MSC donor 16.3 (MSC16.3-EVs). At the age of 7 weeks, liver, spleen and lungs were isolated and hematoxylin and eosin (H&E) staining was performed on these organs. PL: platelet derived EVs; 16.3: MSC16.3-EVs. The scale bars represent 50  $\mu$ m.

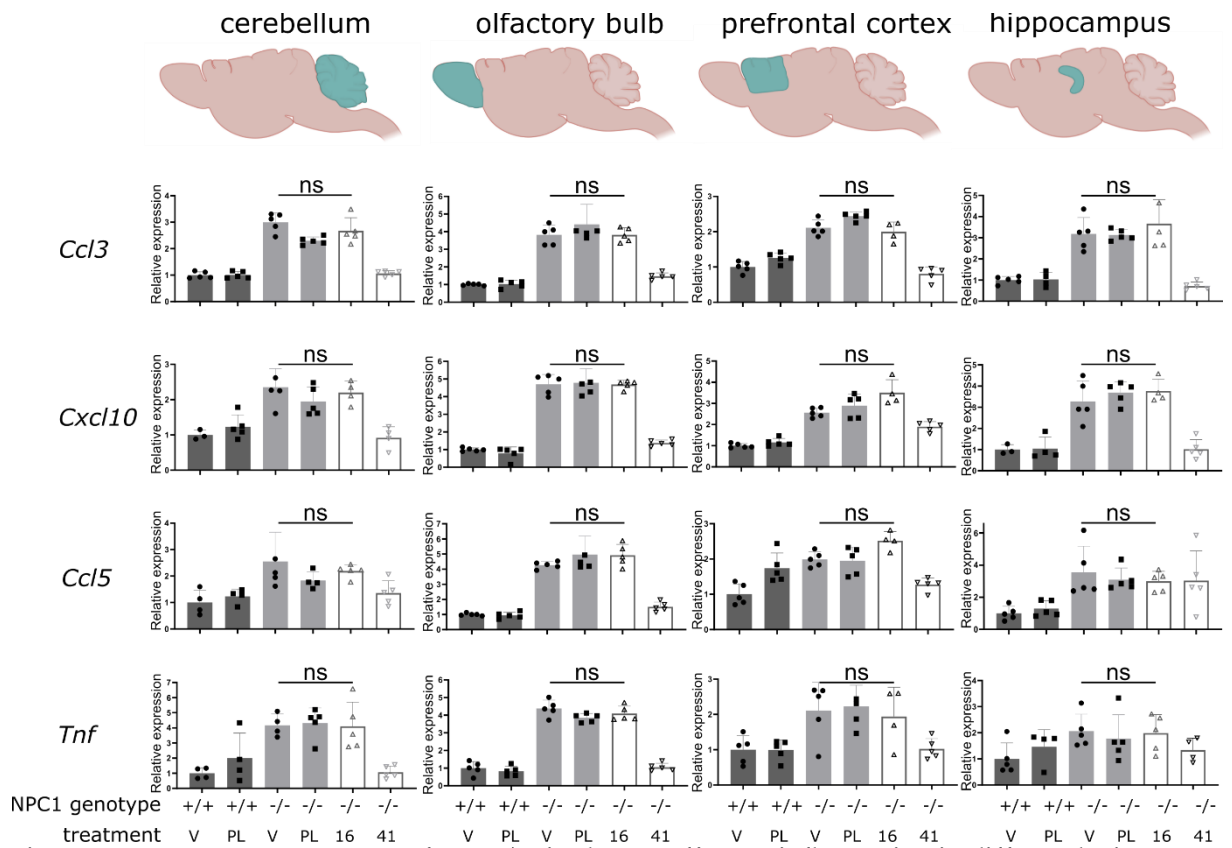

**Figure S3: MSC-EV 16.3 treatment of NPC1<sup>-/-</sup> mice has no effect on inflammation in different brain regions.** NPC1<sup>-/-</sup> mice and wild type littermates are four times injected intravenous into the lateral tail vein with vehicle, platelet derived EVs (PL EVs), MSC-EVs derived from human MSC donor 16.3 (MSC-EV 16.3) or MSC-EVs derived from human MSC donor 41.2 (MSC-EV 41.2). At the age of 7 weeks, different brain regions were isolated and *Ccl3*, *Cxcl10*, *Ccl5* and *Tnf* gene expression was analyzed. Results are represented relative to the NPC1<sup>+/+</sup> vehicle condition. Data are shown as mean  $\pm$  SEM (n=5 mice per group). Statistical analyses on datasets were performed by Mann-Whitney test. ns: non significant).
